# Supplementary material for: Highly Stretchable, Strain-Sensitive, and Ionic-Conductive Cellulose-Based Hydrogels for Wearable Sensors
Source: PubMed Central journal article supplement (PMC6960870; doi:10.3390/polym11122067), 2019-12-11
Supplement: polymers-11-02067-s001.pdf [file polymers-11-02067-s001.pdf]

# Highly stretchable, strain sensitive and ionic conductive cellulose based hydrogel for wearable sensors

Ruiping Tong <sup>1</sup>, Guangxue Chen <sup>1,\*</sup>, Junfei Tian <sup>1</sup> and Minghui He <sup>1,2,\*</sup>

<sup>1</sup> State Key Laboratory of Pulp and Paper Engineering, South China University of Technology, Guangzhou 510640, China; tongpinp@163.com (R.T.); chengx@scut.edu.cn (G.C.); fejftian@scut.edu.cn (J.T.); heminghui@scut.edu.cn (M.H.)

<sup>2</sup> Guangdong Engineering Research Center for Green Fine Chemicals, Guangzhou 510640, China

\* Correspondence: chengx@scut.edu.cn (G.C.); heminghui@scut.edu.cn (M.H.)

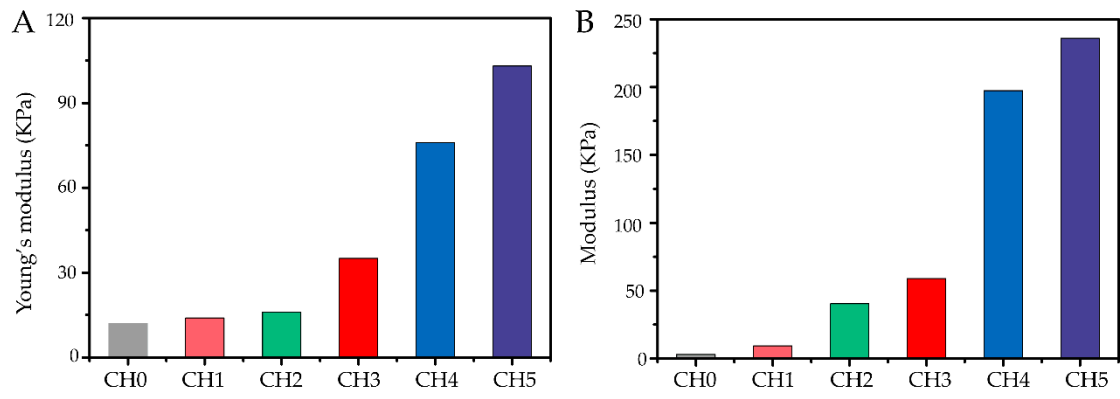

**Figure S1** A) Young's modulus and B) modulus of cellulose based hydrogels (CHs) with different weight ratios of acrylic acid under tension and compression mode, respectively.

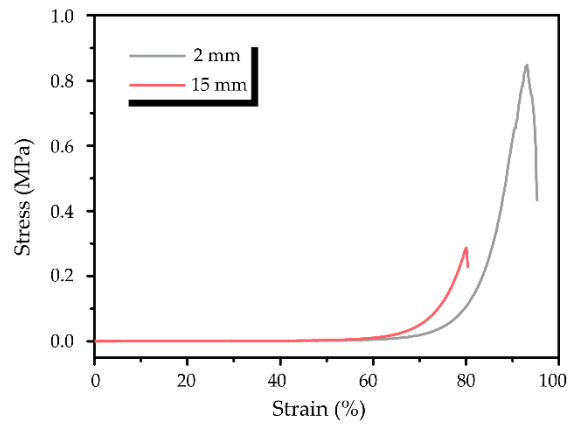

**Figure S2** Compressive stress–strain curves of CH0 with different thickness.

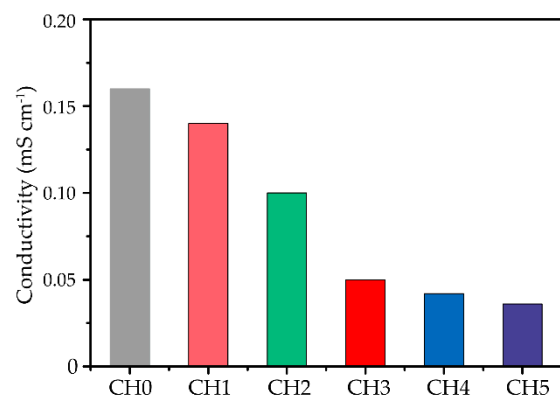

**Figure S3** Conductivity values of CHs.
